# Design considerations for workflow management systems use in production genomics research and the clinic

AE Ahmed<sup>1,2\*</sup>, J Allen<sup>3</sup>, T Bhat<sup>3,4,5</sup>, P Burra<sup>3,4†</sup>, CE Fliege<sup>3</sup>, SN Hart<sup>6</sup>, JR Heldenbrand<sup>3</sup>, DD Istanto<sup>7</sup>, ME Hudson<sup>3,7</sup>, MT Kalmbach<sup>8</sup>, G Kapraun<sup>8</sup>, EW Klee<sup>6</sup>, K Kendig<sup>3</sup>, M Kendzior<sup>3</sup>, NR Mattson<sup>8</sup>, CA Ross<sup>9</sup>, SM Sharif<sup>2</sup>, R Venkatakrishnan<sup>3</sup>, FM Fadlelmola<sup>1‡</sup>, and LS Mainzer<sup>3,10 ‡</sup>

<sup>1</sup>Center for Bioinformatics & Systems Biology, Faculty of Science, University of Khartoum, Sudan

<sup>2</sup>Department of Electrical & Electronic Engineering, Faculty of Engineering, University of Khartoum, Sudan

<sup>3</sup>National Center for Supercomputing Applications, University of Illinois at Urbana-Champaign, Urbana, IL, USA

<sup>4</sup>Department of Computer Science, University of Illinois at Urbana-Champaign, Urbana, IL, USA

<sup>5</sup>Department of Molecular and Cellular Biology, University of Illinois at Urbana-Champaign, Urbana, IL, USA

<sup>6</sup>Department of Quantitative Health Sciences, Center for Individualized Medicine, Mayo Clinic, Rochester, MN, USA

<sup>7</sup>Department of Crop Sciences, University of Illinois at Urbana-Champaign, Urbana, IL, USA

<sup>8</sup>Department of Information Technology, Department of Laboratory Medicine and Pathology, Mayo Clinic, Rochester, Minnesota, USA

<sup>9</sup>Laboratory Pathology and Extramural Applications, Department of Laboratory Medicine and Pathology, Mayo Clinic, Rochester, MN, USA

<sup>10</sup>Carl R. Woese Institute for Genomic Biology, University of Illinois at Urbana-Champaign, Urbana, IL, USA

## Abstract

**Background:** The changing landscape of genomics research and clinical practice have created a need for computational pipelines capable of efficiently orchestrating complex analysis stages while handling large volumes of data across heterogeneous computational environments. **Workflow Management Systems (WfMSs)** are the software components employed to fill this gap.

**Results:** This work provides an approach and systematic evaluation of key features of popular bioinformatics **WfMSs** in use today: Nextflow, **CWL** and **WDL** and some of their executors, along with Swift/T, a workflow manager commonly used in high-scale physics applications. We employed two use cases: a variant-calling genomic pipeline and a scalability-testing framework, where both were run locally, on an **HPC** cluster and in the cloud. This allowed for evaluation of those four **WfMSs** in terms of language expressiveness, modularity, scalability, robustness, reproducibility, interoperability, ease of development, along with adoption and usage in research labs and healthcare settings. This article is trying to answer, “*which WfMS should be chosen for a given bioinformatics application regardless of analysis type?*”.

**Conclusions:** The choice of a given **WfMS** is a function of both its intrinsic language and engine features. Within bioinformatics, where analysts are a mix of dry and wet lab scientists, the choice is also governed by collaborations and adoption within large consortia and technical support provided by the **WfMS** team/community. As the community and its needs continue to evolve along with computational infrastructure, **WfMSs** will also evolve, especially those with permissive licenses that allow commercial use. In much the same way as the dataflow paradigm and containerization are now well understood to be very useful in bioinformatics applications, we will continue to see innovations of tools and utilities for other purposes, like big data technologies, interoperability and provenance.

---

\*Current address: Bernoulli Institute, University of Groningen, The Netherlands. [azzaea@gmail.com](mailto:azzaea@gmail.com)

†Current address: Center for Computational Biology, University of California, Berkeley, CA, USA

‡These authors equally supervised this work

# 1 Introduction

Today's era of data intensive science is introducing drastic changes to the scientific method (Bell et al., 2009; Deelman et al., 2017). Genomics has turned into a large-scale data generation science on par with astronomy and physics (Stephens et al., 2015; Hines, 2018). With this comes a shift in computational environments from local High Performance Computing (HPC) facilities, to distributed grids, and more recently cloud resources, especially within large-scale multi-center collaborative projects (Langmead and Nellore, 2018). Likewise, the pressure to process the ever-increasing amount of data at an ever-increasing pace is driving the evolution of software to automate and parallelize analyses in these HPC environments (da Silva et al., 2017).

Scientific Workflow Management Systems (WfMSs) automate computational analyses by stringing together individual data processing tasks into cohesive pipelines (Liu et al., 2015; Leipzig, 2016). They abstract away the issues of orchestrating data movement and processing, managing task dependencies, and allocating resources within the compute infrastructure (Fjukstad and Bongo, 2017). Additionally, some WfMSs provide mechanisms to track data provenance, execution errors, user authentication, and data security (Figure 1). The rise of WfMSs in modern science has prompted the creation of new standards in the form of Findable, Accessible, Interoperable and Reproducible (FAIR) principles for tools, workflows, and dataset sharing protocols (Wilkinson et al., 2016). These criteria now drive the evolution of containerized software (Tommaso et al., 2015; Schulz et al., 2016) and standard Application Programming Interface (API)s for defining, sharing, and executing code across a range of computational environments (Birney et al., 2017).

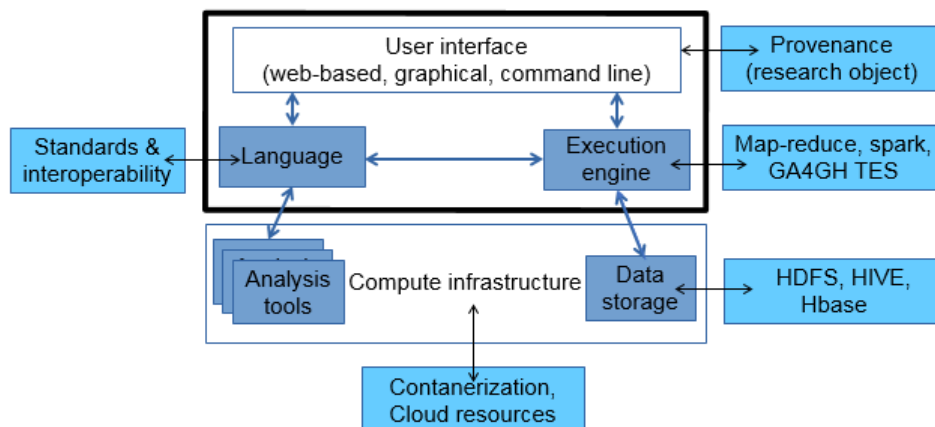

**Figure 1:** A WfMS is middleware between the analyst and the computational environment. It encompasses the workflow language specifications to interconnect the analysis executables, and the execution engine to dispatch tasks and manage dependencies on the compute infrastructure.

Given that so many groups are implementing and using WfMSs (Tommaso, 2019; CDAWS, 2019), we present a systematic, quantitative evaluation and comparison of their capabilities, focusing on deployment and management of analyses that require complex workflow architecture involving loops, conditional execution, and nestedness. Unlike prior reviews (e.g., (Larsonneur et al., 2018)), we will focus on the management of very large analyses across dozens to hundreds of nodes, under circumstances where human interaction would be a significant interruption. These kinds of analyses are performed in large sequencing facilities, major research hospitals, and the agricultural sector.

We identified the following aspects of WfMSs relevant to bioinformatics: (1) *modularity* of the pipeline to enable checkpointing; (2) *scalability* with respect to the number of tasks in the pipeline and the number of nodes utilized per run; (3) *robustness* against failures due to data issues, resource unavailability, or aborted execution; (4) *reproducibility* via logs recording data

provenance and task execution; (5) *portability* across compute environments; (6) *interoperability* of metadata and representation enabling workflow registration in common repositories, language standardization, and ability to translate the same workflow into several programming languages; and (7) *ease of development* by users with a range of experience and computational knowledge. We evaluate these aspects both for the purposes of research analyses and their use in clinical settings, requiring data privacy, governance and strict validation of correctness. The results drive our recommendations for using different **WfMSs** in those settings, and ideas for the future of workflows in biological computing.

## 2 Methods

### 2.1 Nomenclature

We use the terms *workflow* and *pipeline* interchangeably to describe the steps of a given analysis or its implementation. An analysis *step*, or *stage*, of a workflow, means a self-contained computational unit, including serial invocation of multiple command line tools. In some **WfMS** nomenclatures this is called a *process* (in **Nextflow**), *task* (in **WDL**), or *leaf app* (in **Swift/T**). A workflow is therefore a collection of these steps strung together according to some logic, though a workflow script may consist of *sub-workflows*, a group of steps that are themselves a workflow. It is the *execution engine*, *runner*, or *executor* that handles the execution details of running these stages. Finally, we use the word *job* for whatever computation is submitted to the resource manager in an **HPC** setting.

### 2.2 Use case I: variant calling pipeline

**Genome Analysis Toolkit** (**GATK**)’s variant calling pipeline ([McKenna et al., 2010](#); [Van der Auwera et al., 2013](#)) is a typical bioinformatics pipeline that is ideal for testing the expressiveness of a workflow language and the capabilities of a workflow execution engine (Figure [Supp.1](#)). To curtail lengthy run times, proper implementation of this pipeline requires packaging calls to the bioinformatics tools and interleaving the phases of serial and parallel processing over multiple samples. Care must be taken to avoid overwhelming the **HPC** cluster with a large number of jobs or overusing the compute resources. Additionally, upholding the maintenance, portability, and reproducibility of this pipeline can be taxing on the developer, due to its many steps and large number of configurable parameters (supplementary note [1](#)). We used a synthetic dataset, based on the **hg19** human genome assembly and using **Illumina TrueSeq v1.2** targeted regions (Whole Exome Sequencing) to 30X sequencing depth, generated by the **NEAT** simulator ([Stephens et al., 2016](#)). Simulation code is linked to in section [6](#).

### 2.3 Use case II: scalability evaluation

Scalability is an important feature of a **WfMS** that reflects its ability to parallelize across an increasing number of tasks without slowing down processing. To test the scalability of **WfMSs** without biasing the results with the intricacies of variant calling, we built a simplified workflow: Each task was simply a **hostname** command, scattered as an array of **n** parallel processes across **n** cores (i.e., a *1-step workflow*). Additionally, we tested how task dependency chains affected scalability by building a cascade of two identical tasks, also scattered **n** times across **n** cores (i.e., a *2-step workflow*, Figure [2](#)). We performed multiple runs while varying the scalability parameter **n** from 1 to the maximum number of cores in the cluster, and tracked which node every task was deployed on and when. This allowed examination of how well the tasks were distributed among the nodes, the overhead to initiate the **WfMS**, and the maximum possible throughput.

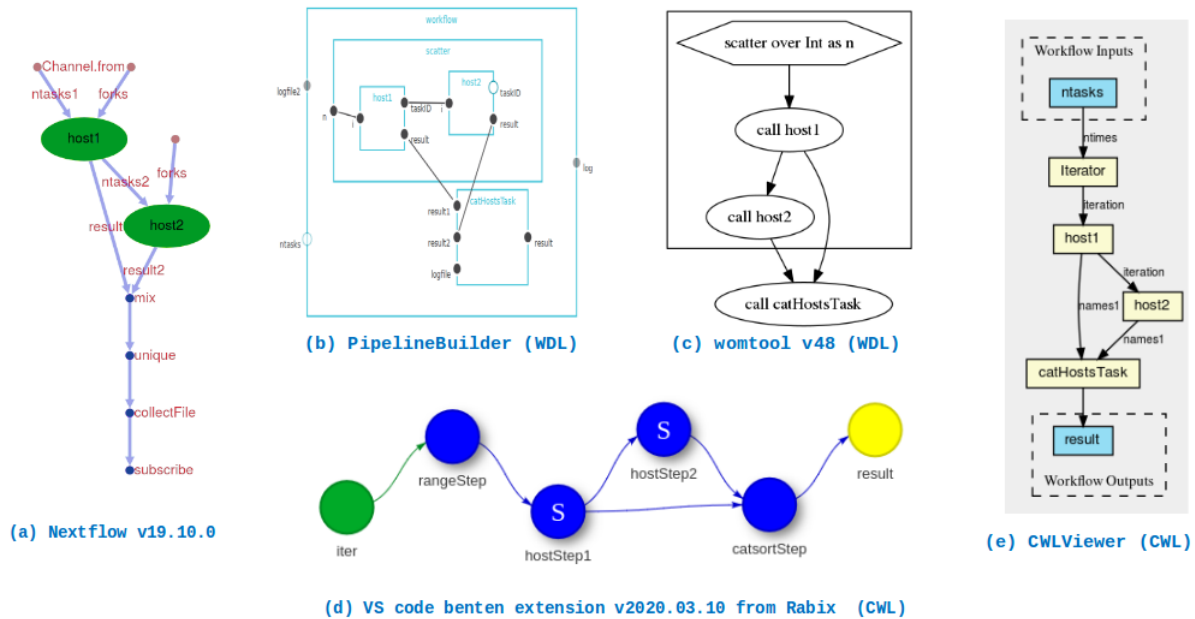

**Figure 2: DAGs corresponding to a simple workflow of 2 processes (besides output aggregation) used to assess the scalability of the executors of section 3.10, as generated by the most recent version of each executor or utility visualizer of each language in Jan 2020**

## 2.4 WfMSs under consideration

We chose WfMSs (Table 1) that support the widely adopted [Global Alliance for Genomics and Health \(GA4GH\)](#) APIs: the [Workflow Execution Service Schema \(WES\)](#) for describing how a user submits a workflow to an execution engine in a standardized way, the [Task Execution Schema \(TES\)](#) for describing batch execution tasks (implemented primarily as [Funnel: https://github.com/ohsu-comp-bio/funnel](#)), and the [Tool Registry Service \(TRS\)](#) for sharing code (implemented primarily as [dockstore: https://dockstore.org](#)). These WfMS languages are [Common Workflow Language \(CWL\)](#) ([Amstutz et al., 2016](#)), [Workflow Description Language \(WDL\)](#) ([Voss et al., 2017](#)) and [Nextflow](#) ([Di Tommaso et al., 2017](#)). For contrast, we included [Swift/T](#) ([Wozniak et al., 2015; Armstrong et al., 2014](#)), a WfMS developed and used primarily in peta- and exascale physics applications ([Wilde et al., 2014](#)). We evaluated the language properties of [Swift/T](#), but did not test its scalability as it has been thoroughly examined earlier (e.g., ([Wozniak et al., 2015, 2016](#))). All four of these WfMSs use the *dataflow* paradigm to provide implicit parallelism in running computations based on the availability of data and compute resources ([Ackerman, 1979](#)), making them suitable for our use case of massively high-throughput production environments.

## 2.5 Computational systems

The above pipelines were developed on personal computers, then ported to an [HPC](#) machine (Biocluster) ([CNRG, 2020](#)) and to Amazon cloud [AWS](#) (Table 2). Biocluster utilizes Slurm for job scheduling and includes five [Supermicro SYS-2049U-TR4](#) nodes of 72 Intel Xeon Gold 6150 2.7 GHz cores, 1.2 TB RAM each. In [AWS](#) we tested three different environments: (1) [Batch](#), provided by [AWS](#), for optimal provisioning of compute resources during batch processing; (2) [Cloud cluster](#), which is built by Nextflow at run time and uses [Apache Ignite](#) for resource management; and (3) a dedicated, fixed-size Slurm [Parallel cluster](#) that we constructed out of 100 worker nodes and a head node, all [m5a.24xlarge](#) instances with 96 cores and ~412 GB RAM each, configured using default [AWS](#) settings.

**Table 1: The WfMSs examined in this study.**

| WfMS             |                       | Use case I: Variant calling pipeline                                                                                                                                                                                 | Use case II: Scalability evaluation                                                                                                         |
|------------------|-----------------------|----------------------------------------------------------------------------------------------------------------------------------------------------------------------------------------------------------------------|---------------------------------------------------------------------------------------------------------------------------------------------|
| Language         | Engine                |                                                                                                                                                                                                                      |                                                                                                                                             |
|                  | Swift/T               | GATK3; multi-sample; single-step if needed ( <a href="#">Ahmed et al., 2019</a> ); <a href="https://swift-t-variant-calling.readthedocs.io/en/latest/">https://swift-t-variant-calling.readthedocs.io/en/latest/</a> | -                                                                                                                                           |
|                  | Nextflow              | GATK 4; multi-sample; <a href="https://github.com/ncsa/Genomics_MGC_VariantCalling_Nextflow/tree/dev-gatk">https://github.com/ncsa/Genomics_MGC_VariantCalling_Nextflow/tree/dev-gatk</a> <sup>‡</sup>               | Same repository for these three WfMSs ( <a href="https://github.com/azzaea/scalability-tst">https://github.com/azzaea/scalability-tst</a> ) |
| CWL <sup>a</sup> | Cromwell <sup>†</sup> | -                                                                                                                                                                                                                    |                                                                                                                                             |
| WDL <sup>a</sup> | Cromwell <sup>†</sup> | GATK4; single sample; <a href="https://github.com/ncsa/MayomicsVC/tree/dev-gatk">https://github.com/ncsa/MayomicsVC/tree/dev-gatk</a> <sup>‡</sup>                                                                   |                                                                                                                                             |

<sup>†</sup> Other engines were limited in portability, conformance to language specification, or setup (Table 4).

<sup>‡</sup> Repositories with identical code structure, which facilitated comparison of results (Supplementary note 1).

<sup>a</sup> Abbreviations: [Common Workflow Language](#) (CWL); [Workflow Description Language](#) (WDL).

**Table 2: Computational testing environments. I and II are the use cases of sections 2.2 and 2.3.**

| WfMS     |          | Biocluster | AWS        |               |                  |
|----------|----------|------------|------------|---------------|------------------|
| Language | Engine   |            | Batch mode | Cloud cluster | Parallel Cluster |
|          | Swift/T  | I, II      | -          | -             | -                |
|          | Nextflow | I, II      | -          | I             | II               |
| CWL      | Cromwell | I, II      | -          | -             | -                |
| WDL      | Cromwell | I, II      | I          | -             | II               |

## 3 Results

### 3.1 Philosophy and main purpose of the chosen WfMSs

The usability, features and performance of a WfMS are driven by the purpose for which it has been developed. [CWL](#) is a language specification designed by the bioinformatics community to unify the style, principles and standards of coding pipelines, in a way that is agnostic of the hardware. It prioritizes reproducibility and portability of workflows and hence requires explicit/pedantic parameters definitions, making it very verbose (figure 4.3). In contrast, [WDL](#) is a language specification that emphasizes human readability of the code and an easy learning curve, at the cost of being restrictive in its expressiveness. Nextflow is a complete system that combines the workflow language and execution engine, and is perhaps one of the most mature WfMSs to-date. Desirable features, such as readability, compactness, portability and provenance tracking are available, yet coding is very straightforward, even for a relative beginner in biological computing. Similarly, Swift/T is a complete system: [Swift](#), the parallel scripting language, is powered by [turbine](#), the execution engine. It was written by physicists and engineers to emphasize scalable deployment of short, rapid-fire tasks at exascale. It is thus a fairly low-level language (similar to C) and extremely powerful, but has a steep learning curve ([Ahmed et al., 2019](#)). Below we explore the impact of these different philosophies on the practicalities of using the four WfMSs in production bioinformatics.

### 3.2 Language expressiveness

Workflow languages are [Domain Specific Languages](#) (DSLs) designed to express the architectures of workflows. A *complete DSL* provides the ability to express any workflow pattern ([van Der Aalst et al., 2003](#)) via a rich library of functions, or the means to write custom functions. These abilities, as well as the look and feel of a workflow language, is a function of its parent language (Table 3). Swift/T inherits the flexibility and versatility of C, incorporating all the familiar functions and ability to write custom functions, and drawing from a wide array of

pre-existing libraries, including those written in `Tcl`, the parent language of `turbine`. `Swift/T` reads like a low-level language, which can be difficult for a novice programmer, but provides unparalleled ability to express any complicated workflow logic and embed any advanced algorithm or operation. The Groovy-based `Nextflow` is similarly powerful, though easier to work with, providing the object-oriented look and feel of Java and access to any library written for `JVM`. Example implementations of complex patterns, such as upstream process synchronization, exclusive choice among downstream processes, and feedback loops, are available in the documentation (Tommaso et al., 2019). Like `Swift/T`, `Nextflow` treats functions as *first class objects* (Scott, 2009) that can be used in the same ways as variables, enabling the programmer to create easily extensible pipelines, which is a very important feature in the world of ever-changing bioinformatics analyses.

`CWL` and `WDL` are qualitatively different. They are better viewed as language specifications with strictly defined grammar. Parsers built in other languages, such as Java or Python, interpret this grammar. Thus, `CWL` and `WDL` are more restrictive in their expressiveness, but more readable and easier to use. `CWL` has no functions, but supports Javascript code blocks to express complex code patterns, provided the `InlineJavaScriptRequirement` is specified in the script document. However, the `CWL` team does not consider these code blocks a good coding practice and advises against overusing them (Hodges and Crusoe, 2020; Robinson et al., 2020; Arvados team, 2020). Worse yet, conditionals were not directly supported in `CWL` until version 1.2.0 released in August 2020, after much discussion in the community (CWL group, 2020a). Likewise, `WDL` does not permit programmers to define custom functions and has a very limited library of basic operations. Furthermore, both languages evolve independently of execution engines, which sometimes fail to provide support for certain features. For example, until March 2020, nesting conditionals within loops was not supported with `toil-wdl-runner` (Vivian et al., 2017), nor are the nested loops in `WDL draft-2` code executable by `Cromwell` (Voss et al., 2017) (see table 4), even though `WDL` specification does not forbid these patterns. Counterintuitively, this makes `CWL` and `WDL` particularly well suited for describing biological analysis workflows, by focusing on declarative syntax where each step of the workflow appears clearly in the script. Their expressiveness limitations have been purposefully imposed to enforce good coding practices and prevent unnecessarily complex workflows that cannot be unambiguously resolved. Despite these advantages, experienced coders may find `CWL` and `WDL` somewhat claustrophobic.

**Table 3: Summary of language-level differences among `Swift/T`, `Nextflow`, `CWL` and `WDL`.**

| Aspect                   | <code>Swift/T</code>                                                    | <code>Nextflow</code>                                                      | <code>CWL</code>                                                                     | <code>WDL</code>                                       |
|--------------------------|-------------------------------------------------------------------------|----------------------------------------------------------------------------|--------------------------------------------------------------------------------------|--------------------------------------------------------|
| Parent language          | C, tcl                                                                  | Ruby and Groovy                                                            | N/A                                                                                  | N/A                                                    |
| Compilation              | Compiled                                                                | Interpreted                                                                | Compiled                                                                             | Compiled                                               |
| GUIs                     | -                                                                       | NextflowWorkbench (Kurs et al., 2016), DolphinNext (Yukselen et al., 2020) | Rabix composer                                                                       | Pipeline Builder (EPAM systems, 2019)                  |
| DSL features             | complete, extensible in tcl                                             | complete, extensible in Groovy and Java                                    | limited standard library, extensible via javascript                                  | limited standard library                               |
| Variables                | typed, unique within scope                                              | qualified, unique within scope                                             | typed, unique identifiers                                                            | typed, fully qualified names                           |
| Loops                    | sequential <code>for</code> and parallel <code>foreach</code>           | parallel <code>queue channels</code>                                       | parallel <code>scatter</code> via <code>ScatterFeatureRequirement</code>             | parallel <code>scatter</code>                          |
| Conditionals             | <code>if-else</code> and no-fall through <code>switch</code> statements | via <code>when</code> declaration within a process                         | <code>when</code> and <code>pickValue</code> fields proposed in <code>CWLv1.2</code> | <code>if</code> blocks producing optional output types |
| Enforcing good practices | -                                                                       | <code>nf-core</code> (Ewels et al., 2019)                                  | <code>CWL</code> guide (Hodges and Crusoe, 2020)                                     | -                                                      |

### 3.3 Support for modularity

Modularity is a very important design principle for production bioinformatics workflows. The core idea is to build a library of reusable modules (tasks or subworkflows) and assemble them into various master workflows (Figure 3). This enables (1) performing different analyses without having to refactor the entire workflow; (2) check-pointing and restart of a workflow run from a task in the middle of analysis if needed; and (3) customizing runtime environments and compute resources which may vary between analysis stages.

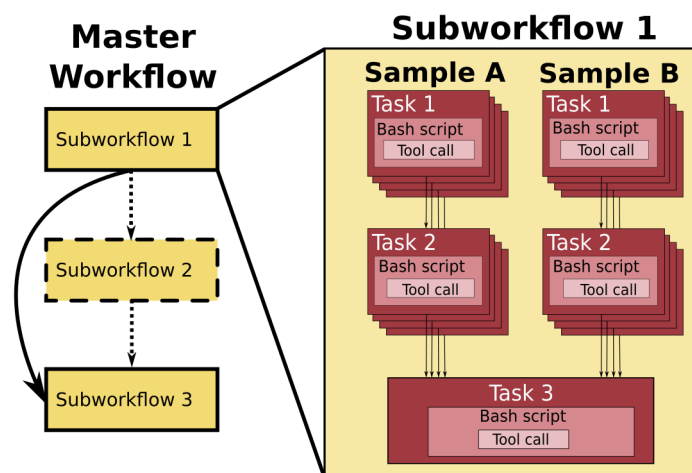

**Figure 3: Bioinformatics workflows with multiple levels of complexity warrant a modular construction. It is easiest to program the workflow when its logic is abstracted away (in Tasks, red) from the command line invocations (in Bash scripts, pink) of the bioinformatics tools (light pink). Individual workflows can be further used as subworkflows of a larger Master workflow (e.g., [Supp.1](#)). This architecture facilitates expression of additional complexity due to optional modules (dashed line), nested levels of parallelism (groups of arrows connecting red rectangles) and scatter-gather patterns (task 2 scattered across samples being merged into task 3).**

The superior expressiveness and extensibility of Swift/T make it trivial to implement modularity via user functions, library imports, or leaf functions wrapping scripts written in other languages. Out of the four WfMSs we are comparing, Swift/T is the most permissive, at the cost of not having an explicit notion of a workflow. Nextflow is similar, but not quite as permissive as Swift/T, where it defines `process`s to wrap user’s scripts written in other languages and considers a workflow to be a series of those `process` definitions. Nextflow lacked the ability to import and reuse processes, until recently with Nextflow [DSL-2](#). WDL has the most intuitive modular workflow scripting, as it explicitly defines `tasks` wrapping Bash commands or Python code, and `workflows` composed of calls to those `tasks`. This mechanism makes implementing modular workflows matching to the everyday logic of a bioinformatics analyst. The resultant WDL master workflows contain subworkflows, which consist of tasks, that in turn call Bash code and third-party executables ([Mainzer et al., 2020](#)). They are very easy to write and read, and are therefore highly extensible and maintainable. In contrast, this readability aspect cannot be said of CWL. It defines `CommandLineTool` and `Workflow` classes to distinguish individual command-line invocations from the workflow logic calling them. Workflows can be nested by treating subworkflows similarly to `CommandLineTools`, so long as the ‘`SubworkflowFeatureRequirement: {}`’ is added into the header. Thus, in principle, a CWL workflow is extensible and modular by the design of the language. Unfortunately, the code ends up being extremely verbose (Figure [Supp.4](#)), and takes a lot longer to develop than the other three WfMSs.

We conclude that all four evaluated languages deliver satisfactory support for modularity at the code level, though ease of use remains in the eyes of the programmer. Use of modularity for custom resource allocation, check-pointing and auto-restart from the point of failure, is the executor’s job, and (sections [3.7](#) and [3.11](#)).

### 3.4 Data dependencies and parallelism

In the dataflow paradigm (Ackerman, 1979), data dependency and parallelism go hand in hand. Blocks of code that do not have data dependencies among them are executed in parallel (implicit parallelism), e.g., quality checks on a BAM file. A different mechanism is usually implemented for code blocks meant to run in parallel (explicit parallelism), e.g., read alignment across multiple lanes (Figure Supp.1). The four languages studied differ in handling the switching between the implicitly parallel and the explicitly serial phases of an analysis (Figure Supp.4).

Swift/T employs `foreach` and `for` statements for parallel and sequential iteration over array elements, respectively. The `=>` or `wait` statements enforce serial execution of tasks where explicit data dependency is missing, as Turbine will otherwise attempt to parallelize such statements. Yet, with its low-level language style, the vigilance in writing complex Swift/T workflows can be taxing, and the resultant code difficult to debug for parallelism issues.

In contrast, WDL and Nextflow stylistically separate the areas where sequential execution of multiple commands is permitted. `command` blocks inside WDL tasks are equivalent to the `script` blocks inside Nextflow processes. Parallel execution is assumed among WDL tasks, unless data dependency exists between inputs and outputs of different tasks. Explicit `scatter` statements parallelize execution over array elements, while results are implicitly gathered. Uniquely, Nextflow defines both process dependencies and parallelization via input/output variables, where a multi-valued `queue channel` signals parallelization over its elements. This elegant approach yields compact code, at the expense of readability. First, it requires careful pipeline design, because a process is executed as many times as the size of its shortest `queue channel`, and their types and sizes matter. Second, gathering results after parallelization needs to be coded explicitly. On the plus side, channels make it trivial to expand pipelines. For example, expanding from single sample to multi-sample joint calling is achieved by merely adding the downstream JointGenotyping process, without the addition of a nested loop across the samples.

CWL is fundamentally different: its `CommandLineTool` is an invocation of a single shell command, not a series of sequential commands or even a string of piped commands. Because many tools are common among bioinformatics pipelines (e.g., samtools), this restriction encourages reuse of the corresponding `CommandLineTool` modules, facilitating standardization and therefore reproducibility. It is easy to think of a CWL `CommandLineTool` as a very restricted version of a WDL task: they both have inputs, outputs, metadata, resources options and a script, but in CWL only a single command is allowed. Parallelization in CWL is accomplished via `ScatterFeatureRequirement {}`, similar to `scatter` blocks in WDL.

### 3.5 Executor-level differences

The workflow executor is the WfMS component resolving the workflow syntax into a graph of dependencies between tasks, typically expressed as a Directed Acyclic Graph (DAG) (Figure 1). Then it deploys those tasks in the correct order on the given infrastructure by scheduling the jobs, provisioning compute resources, and tracking the jobs to completion. Executors may have other functionalities for data staging, monitoring, and error recovery. These aspects are explored in subsequent sections for key executors of each WfMS (Table 4).

In Swift/T and Nextflow, the workflow language and its executor are packaged together, and therefore co-evolve without compatibility issues. Conversely, CWL and WDL only specify the language syntax, which may be supported by a variety of execution engines. This results in a healthy competition among the engines, but also raises compatibility issues.

In addition to standalone executors, there are API libraries for interpreting workflow languages. For example, miniWDL (Lin et al., 2020) is a local runner for WDL and a Python API - a developer toolkit enabling WDL workflows to run from within Python scripts. This opens up possibilities of building a richer workflow ecosystem through embedded data parsers, job visualization, and other useful features.



**Table 4: Summary of executor-level differences among Swift/T, Nextflow, CWL and WDL. Any given feature of a workflow language can be assumed supported by the executor, unless we note otherwise. Supported language versions are in parentheses for each executor. *Italics* indicates engines we thoroughly examined.**

| Language | WfMS<br>Execution engine                         | Remarks                                                                                                                                     |
|----------|--------------------------------------------------|---------------------------------------------------------------------------------------------------------------------------------------------|
|          | <i>Swift/T</i><br><i>Nextflow</i> (DSL-1, DSL-2) | Complete WfMS, supporting conditionals, loops and nested logic.                                                                             |
| CWL      | <i>cuttool</i>                                   | The official reference implementation of an execution engine for the complete CWL standard (CWL group, 2020b); no cluster or cloud support. |
|          | <i>Cromwell</i> (1.0)<br>toil-cwl-runner (1.0.1) | Supports CWL workflows via WOM.<br>Optimized for cloud environments.                                                                        |
|          | rabix executor<br>(sbg:draft-2, 1.0)             | This single node local executor is no longer supported by the original developer team at Seven Bridges.                                     |
|          | arvados, cwl-tes, airflow                        | Tedious setup.                                                                                                                              |
| WDL      | <i>Cromwell</i> (draft-2, 1.0)                   | De facto standard for executing WDL workflows. Support for nested loops is version-dependent.                                               |
|          | <i>toil-wdl-runner</i> (draft-2)                 | No support for modularity or nesting of loops and conditionals.                                                                             |
|          | miniWDL (draft-2, 1.0)                           | No cluster or cloud support. Includes Cromwell wrapper.                                                                                     |

### 3.6 Workflow dependency graph resolution and visualization

The dataflow paradigm requires the executor to deterministically resolve the supported workflow patterns (van Der Aalst et al., 2003) into unambiguous DAGs while controlling for environmental variables and random seeds (Bocchino Jr et al., 2009). This determinism ensures that all processes using independent inputs are scheduled to run in parallel; whereas processes linked via data dependencies are scheduled to run in the appropriate order. Due to these requirements, some features, e.g., conditionals (CWL group, 2020a) and workflow dry runs (Di Tommaso and Hancock, 2020), are difficult to implement in dataflow programming. Each execution engine we studied negotiates its own semantics with the corresponding workflow language to ensure correct DAG construction, succeeding in its own way. Workflow DAG resolution requires handling many small details and careful development and co-evolution between the executor and the workflow language. Conformance of the executor to the language specification is critical to avoid unresolvable patterns when programming complex workflows or when migrating from one executor to another (Eddy, 2018).

Among the four WfMSs we considered, all but Swift/T have built-in engine functionality or auxiliary tools to visualize DAGs for debugging and documentation. Nextflow produces the DAG upon completion of a workflow execution, in static or interactive format, using Cytoscape.js (Franz et al., 2015) and Dagre graph visualization libraries (Figure 2a). Alternatively, NextflowWorkbench (Kurs et al., 2016) and DolphinNext (Yukselen et al., 2020) provide convenient graphical and web interfaces developed outside the Nextflow core team for visualizing, creating, deploying and executing Nextflow pipelines. For CWL, CWLViewer (Robinson et al., 2018) conveniently produces the DAG of a workflow script from its GitHub repository (Figure 2e), if the code is public and complies with CWL best practices. The Rabix suite, by Seven Bridges, provides powerful CWL interactive visualization library (CWL-SVG), GUI (Composer), and language server (benten) (Figure 2d), which are used in other sophisticated projects like VueCWL (Milton, 2019). For WDL, besides the *de facto* womtool utility and its graph visualization option (Figure 2c), EPAM systems have developed Pipeline Builder (EPAM systems, 2019), a Javascript library for interactively constructing and visualizing WDL scripts (Figure 2b).

### 3.7 Job execution: resources provision

Bioinformatics workflows are often heterogeneous in terms of the computational resources required for each task. For example, genome assembly can begin with read alignment (a core-intensive process), followed by a deBruijn graph construction (a RAM-intensive process). For efficiency, the executor must decipher which tasks can be run as individual computational units on hardware (i.e. node) with RAM and cores appropriate to needs. Within the dataflow paradigm, these independent units are, by definition, the vertices on the DAG. Upstream and downstream nodes on the DAG (i.e. prerequisites and dependents, respectively) can be placed on other hardware with adequate resources.

The actual provisioning of the computational resources is achieved by interacting with a cluster resource manager (CRM), such as PBS Torque, Open Grid Engine, or Slurm. The CRM tracks the available queues, the available nodes, and how long nodes will remain occupied. If the workflow language has the ability to specify resources necessary for different tasks, then the execution engine may be able to negotiate these requirements with the CRM. This is commonly achieved via executor backends, which provide a mechanism to specify the computational requirements as part of command line workflow invocation or via configuration files.

Particularly useful is the support for *dynamic job scheduling*, present in all four WfMSs under consideration. During workflow execution a job may pass runtime parameters to another job or schedule other jobs. Customization of runtime parameters per workflow stage (section 2.1), including docker images specifications, memory, queue and/or cloud resources is readily possible in Nextflow, CWL and WDL. In Swift/T however, these details are specified once at beginning of the workflow; thus, customization can only be achieved by breaking up the main workflow into independent pieces and running those smaller workflows independently. Tables 3 and 4 in (Ahmed et al., 2019) show backends supported by select executors, and Figure Supp.3 shows typical command line invocations.

### 3.8 Job execution: data staging

Bioinformatics data processing frequently involves movement of private and very large datasets (TBs or more) across infrastructure that is set up on a shared filesystem. The resulting security and performance concerns create a need to isolate the workflow execution environment and provide a means for checking the integrity and permission settings on files used and produced within a workflow run. Data isolation is commonly accomplished by enabling special treatment of the `file` type variable by the engine, e.g., file integrity checking and hashing. Additionally, localization (staging) of inputs into a working directory unique to each computational unit (1) assures that raw input data remain intact; (2) prevents race conditions if a file needs to be accessed by multiple computational units simultaneously; (3) serves as a record of provenance for each input, output, intermediate file, script and log, enabling easy monitoring and debugging; and (4) enables workflow restart from the failed stage without repeating prior computations.

Nextflow and executors of CWL and WDL all provide this staging capability via a canonical hierarchy of execution folders. The working directories of subworkflows, tasks and Scattered blocks are nested within a parent directory of the run. Unique folder naming is ensured by using long hexadecimals, names of the workflow stages, and/or execution timestamps. The exact structure of the working directory and the subfolder names within vary by engine (Supplementary note 4), and the user has no control over these parameters, which may seem constraining. However, it pays off in permitting the engine to automatically follow the task dependency string and prevent filename clashes for subsequent tasks. Conversely, in Swift/T, the programmer must manually create a directory tree and name files, which is error prone in complex workflows.

In addition to the enforced separation of files in the output folder tree, further data staging can be achieved by placing them on different filesystems, such as a cloud bucket for inputs vs. local folder for outputs. Nextflow supports this out of the box: the analyst need only specify

a URL to enable reading of inputs from [AWS S3](#) storage or Google cloud buckets. Cromwell and Toil similarly support this ability, though in Cromwell the programmer needs to be specific about the filesystem being pointed to. Unfortunately, in Swift/T the support is more limited: documentation stipulates the means of specifying remote filesystems, but our experiments with that have not been successful.

### 3.9 Portability across HPC environments and the cloud

Modern biomedical research increasingly benefits from multi-site collaborations. Support for portability, the ability to run a pipeline in computing environments besides the one on which it was developed, has become one of the deciding factors in adopting a particular [WfMS](#). One of the most important aspects impacting portability is hardcoding any system-specific parameters or paths. Separating the pipeline code from the input specification helps detect and eliminate this problem, usually via configuration files. Nextflow, [CWL](#), and [WDL](#) made this a requirement. [CWL](#) and [WDL](#) imposed further constraints by using structured [YAML](#) and/or [JSON](#) files and enforcing variable checks on identifiers or fully qualified names at compile time. Swift/T is the least restrictive, putting the onus on the programmer to ensure that variables are defined in a way that does not impede portability (Figure [Supp.3](#)).

All executors we examined have ample support for running in a variety of compute environments (Tables 3 and 4 in ([Ahmed et al., 2019](#))), except that support for [AWS](#) and [Google Cloud Platform \(GCP\)](#) is insufficient in Swift's turbine. Cloud deployment in general comes with different considerations than [HPC](#). First, the executor needs to communicate with cloud [APIs](#) to provision and administer the resources specified in the configurations options. Second, the provisioned cloud resources are typically clean machine instances, providing only the basic operating system and minimal libraries. Thus, executors rely on containerization of software used by the workflow and expect container images of those tools and their dependencies as part of the workflow runtime options. Third, significant cost savings can be achieved when executors support automatic sizing of cloud resources, enabling instances to be spun up when needed and shut down when idle; [AWS batch](#) is a good example. Finally, workflows intended to run in the cloud also expect data to be stored in the cloud. Thus, some level of security is expected from the cloud provider. These are important considerations when evaluating the capabilities of a [WfMS](#) for a project intended to run in the cloud.

While executors in the cloud may be affected by a variety of other factors, such as provider, zone, availability of resources or type of machine instance, this is an actively developing area of technology and providing a detailed review is beyond the scope of this work. We did, nonetheless, perform a cursory evaluation of portability by deploying the variant calling pipeline in both [AWS Batch](#) and [Cloud cluster](#) (Table 2), which was successful.

### 3.10 Scalability

When running a workflow on a substantial number of samples in a shared environment, one must weigh the trade-offs between total run time and computational cost, which is a product of both the run time and number of nodes utilized. Two performance metrics are important: (1) How well the execution engine scales with the number of parallel tasks: The task management overhead may increase out of proportion with the total number of tasks, if the engine is not programmed efficiently. (2) How well the engine packs tasks on a node: It must weigh the core and [RAM](#) availability on a node against requirements of the tasks, and pack tasks optimally onto nodes, without many gaps or unused resources.

We compared the performance of Nextflow and Cromwell (running [WDL](#) and [CWL](#) code) against these criteria by designing very simple one-step and two-step workflows. A task was just to echo the hostname (i.e. node ID) of the node where the task was placed during execution. The command requires a negligible amount of [RAM](#), only 1 core, and takes a minuscule amount

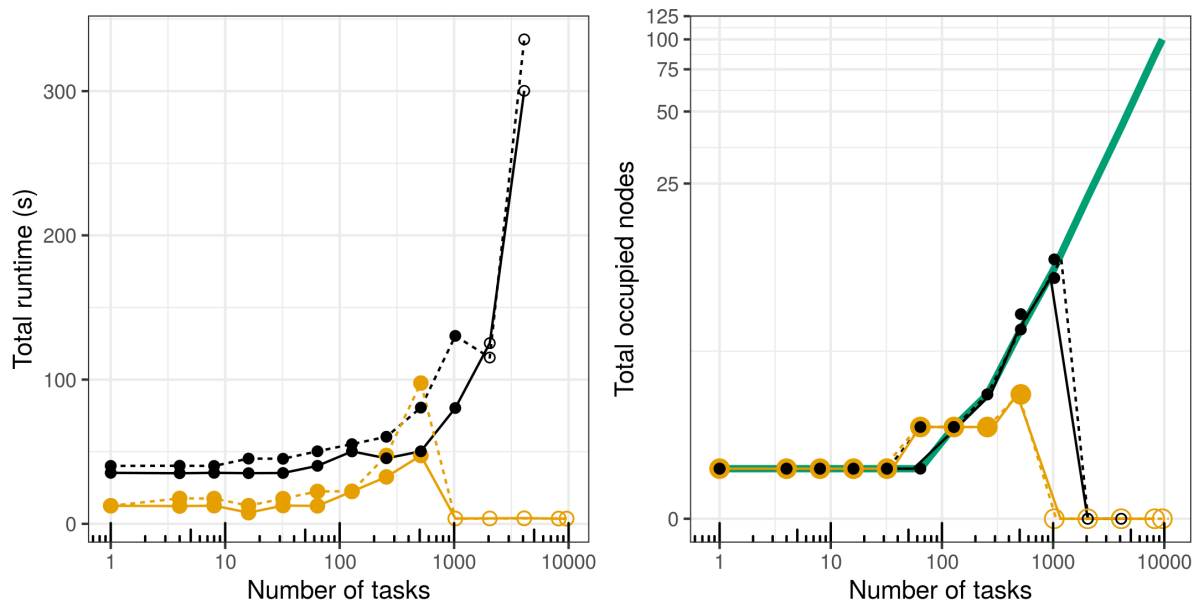

**Figure 4: Scaling a one-step (solid line) and two-step (dashed line) workflow in Cromwell+WDL (black) and Nextflow (yellow). The thick green line in the right panel is the theoretical optimum of the number of nodes that should be occupied by the tasks, computed as the ceiling of tasks/cores-per-node. Empty circles denote failed runs.**

of time. Thus any overhead on task management is readily apparent from the total time of the workflow. We ran the same workflow with varying number of tasks meant to be computed in parallel, always on the same dedicated, fixed-size AWS Slurm Parallel cluster of 9600 cores, in an attempt to control for any extraneous performance variation.

Nextflow and Cromwell both showed excellent performance up to about 100 tasks: the elapsed workflow run time did not increase significantly with the number of tasks, suggesting that they were properly parallelized with minimal management overhead (Figure 4, left panel). Nextflow performed particularly well, finishing the runs about 4 times faster than Cromwell. Two-step workflows predictably ran longer, but not twice as long, which indicates a substantial amount of time is spent at startup for both engines. Performance began to break down at higher task counts, intermittently resulting in failure to start jobs. Nextflow could not be used at all on more than 512 tasks: it quickly stopped the run and cleaned-up. In contrast, Cromwell became unusable beyond 1024 tasks, but the clean-up for the failed job took a very long time (hours in some cases) before finally reporting an exit code. Cromwell+CWL performed similar to Cromwell+WDL (Supplementary note 5.2). To understand what caused the scaling issues, we looked into process context switches, both voluntary (where processes yield CPU access to another) and involuntary (where the kernel suspends process access) and found both types to increase with the task count (Figure Supp.5). CPU utilization was measured as well, as the `user+system` time divided by the total run time of the task (from the Linux `time` command), however no easily interpretable pattern emerged (Figure Supp.6).

We measured the quality of node packing by using the outputs from our mini workflows, the hostnames where tasks were run. These records were deduplicated, giving the count of individual nodes used by the workflow. We expected no re-use of nodes, because the total core count was always larger than the task count, and all tasks should be immediately parallelized. Indeed, the two engines correctly placed all tasks onto the same 96-core node in runs up to 32 tasks (Figure 4, right panel). However, Nextflow unnecessarily distributed 64 tasks on two nodes, while also constraining 265 tasks to 2 nodes, instead of spreading them to 3 nodes, as would

have been optimal. We suspect this happened because while we were controlling the `maxForks` directive, we used the default value of the `queueSize` parameter, which defines "the number of tasks the executor will handle in a parallel manner". This is something to keep in mind when working with large data batches. Admittedly, this inefficiency did not prevent Nextflow from outperforming Cromwell in terms of run time, despite Cromwell spreading the processes across nodes in near-perfect alliance with theoretical expectation (the thick green line in Figure 4, right panel). In this figure, executor values below the green line suggest unnecessary queuing of processes; while values above it suggest the executor is using more nodes than necessary.

### 3.11 Robustness

When running large scale analyses, especially in medical production settings, where a workflow failure can lead to delay in diagnosis and treatment of patients, it is extremely important to have a **WfMS** that facilitates the development of easy to debug and maintain error-free code, and which results in robust execution against variations in the nature of the data, load on the compute system, and hardware failures. Beyond traditional provisions for code robustness, **WfMSs** have the potential to facilitate recovery and restart after failure of an individual analysis step. Ideally, the need to rerun costly analyses from the very beginning could be obviated via "*safe crash*": by moving the completely processed files to their destination, deleting partially processed files, and saving execution logs and status (check-pointing) for all parallel processes. A number of approaches have been developed in this field to facilitate these traditional and non-traditional robustness aspects.

*Variable typing* facilitates earlier discovery of bugs before the workflow is run, especially in *compiled* languages (Table 3). While Swift/T, **CWL**, and **WDL** provide the typical **String**, **Integer**, **Float**, and **Boolean** types, Nextflow does not distinguish between these but rather uses *qualifiers* to indicate how variables are to be handled. For example, variables local to a process have a `val` qualifier, whereas environment variables should be declared as `env`. Workflows in bioinformatics usually operate on files, thus **WfMSs** must also define a `file` variable, ideally with a mechanism to check whether the file exists and has the right permissions, to avoid data access failures in the middle of analysis (cf. data staging, section 3.8)). While the four **WfMSs** studied provide this, Nextflow goes above and beyond generic functions for reading and writing. Nextflow provides refinements to handle especially large, binary and compressed files. Additional domain functions include counting the number of records in FASTQ/FASTA files, splitting file entries based on chunk size, memory limit, etc. Such well-vetted, built-in functionality significantly reduces the likelihood of programmer error, thus conferring robustness.

*Provisions to ease parsing and validating* the code can greatly contribute to the robustness of the final software. Unsurprisingly, most **WfMSs** make use of such tools. Nextflow workflows can use of `nf-core schema` commands (Alneberg et al., 2019). Similarly, **WOMtool**, **miniWDL** and **Oliver** ease validating, parsing and generating **WDL** scripts and inputs. **CWL** takes advantage of standard editor plugins for vim, emacs, VScode and atom, and code generators for R, Go, Scala, and Python. Swift/T can only be accessed via the command line. No helper library is mentioned in the documentation either.

*Data streaming* is an alternative to data staging, and is very popular in bioinformatics. Here, instead of saving output of an upstream task to a file that is read by the downstream task, data are streamed, usually via a Linux pipe, from one process to the next. Such streaming requires synchronization of the two processes and could lead to complicated logic. Additionally, it can make it harder to record and debug execution logs. Perhaps for these reasons, data streaming is only directly possible with Nextflow **DSL-2** syntax, as of the time of writing (March 2021). For **CWL**, the language specification defines a "`streamable: true`" field for output files, but direct support for this property is not yet part of the reference `cwltool` or other **CWL** runners. Neither Cromwell, Toil, nor Swift/T support piping either.

*Job retries* is an approach to retry a failed workflow step, and can be appropriate if the failure happened for an intermittent reason, such as service time-out, node unavailability or node failure. Swift/T allows retrying a failed job a number of times that can be set by the user, on the same `MPI` rank or on a randomly selected rank from those allocated to the workflow, possibly in other cluster nodes. Nextflow couples the `maxRetries`, `maxErrors`, and `errorStrategy` process directives to allow the user to `retry` a failed process, `ignore` the error, `finish` the run, or totally `terminate` the workflow effectively killing submitted processes. Similarly, Cromwell allows `maxRetries` as part of the `runtime` or `workflow options`, and also allows to either `ContinueWhilePossible` or resume but with `NoNewCalls` to quickly exit when a failure is detected.

*Caching or automatic check-pointing*, i.e., the ability to resume partial execution of a run, saves time and computational resources, especially when a large chunk of analysis has completed successfully. Swift/T is poor in this regard, as it always starts execution from the beginning, unless the programmer manually codes subworkflows separated at the anticipated checkpoints, and implements options to manually rerun subworkflows individually (Ahmed et al., 2019). Nextflow is on the opposite end of the spectrum, permitting very granular access to workflow stages for restart purposes. This is accomplished by keeping all staged and intermediate files in a `work` directory with a `cache` directive enabled by default to index both scripts and input metadata (name, size, path, etc.). The granularity of restart can be controlled via `deep` and `lenient` modes. In contrast, call caching is by default disabled in Cromwell. It can be enabled by configuring a `MySQL` database instead of its default `HSQL` in-memory database and enabling the options for finer metadata checking, such as file hash caching, path prefix, and docker images' tags.

### 3.12 Debugging workflows

There are many reasons a workflow can fail: the nature of the data, a malfunction in the bioinformatics tool itself, improper setup or call of the bioinformatics tool, a bug in the execution engine, a hardware problem, an operating system issue, or something else entirely. Ideally, the log files for all these aspects would be cleanly separated, so that the workflow operator could easily trace the problem by hypothesizing the source and going through these logs one at a time. However, due to the asynchronous execution of independent workflow steps, messages can be echoed into the logs out of logical order, resulting in difficulty interpreting them. Each `WfMS` resolves this issue in its own way.

Swift/T provides a simple `MPE`-based model to track execution at the level of Swift and `turbine` operators. Messages are printed into a single log file in order of occurrence, not the order of the pipeline `DAG`, making it hard to discern invocations of individual bioinformatics tools. This makes it very difficult to determine the first step that failed and what data it was running on. Tool-level logs must be custom made, and even these logs can be difficult to interpret.

In contrast, as we mentioned before (section 3.8), Nextflow and the runners of `CWL` and `WDL` produce a canonical hierarchy of execution folders, with logs capturing the status of each workflow step saved into the same subfolder as the actual bash script being executed, along with the corresponding input and output data. Therefore, all the information about that particular step is in one place. In addition, the standard output from the executor is normally enough to establish which subfolder to inspect for signs of trouble.

### 3.13 Monitoring the progress of workflow execution

The ability to monitor the progress of a workflow becomes critical with more tasks and increased workflow complexity. This monitoring facilitates scheduling, helps prepare the output data staging area, allows early detection of lag in a step, and yields information necessary for reporting, subsequent or retrospective analysis, and billing.

Nextflow supports several levels of detailed monitoring upon executing a workflow: (1) a crude `trace` report, (2) an html `timeline`, and (3) a complete `execution report`, including information about resources usage and processes runtime metrics (e.g., status, hash, command). Additionally, Nextflow is adding the `Research Object (RO)` model (Belhajjame et al., 2015), and thus adding greater transparency by uniquely identifying, collecting, and linking all provenance metadata of workflow runs (Garriga Nogales et al., 2018). Additionally, Nextflow has support for email notifications of workflow events like `onComplete` and `onError`, independent of the usual notifications from the `CRM`.

For `WDL` workflows, Cromwell only supports a `timeline` visualization, but only if run in `server` mode. The `CWL` community has developed `CWLProv` (Soiland-Reyes et al., 2018), an informal profile standard defining how to record provenance of a workflow run as an `RO` using Linked Data standards (Khan et al., 2019). This is implemented in the reference `cwltool`, and is planned for implementation in `toil-cwl-runner` too.

There are efforts to improve monitoring capabilities of these `WfMS`. Nextflow has the `Tower` platform (Tommaso et al., 2020) for efficient monitoring and deployment; whereas `WDL` workflows can be submitted to a Cromwell server and examined via `cromshell` (Smith et al., 2020) and Oliver (St. Jude Cloud Team, 2020).

### 3.14 Reproducibility and standardization

Reproducibility in biomedical analyses has become important recently (Grüning et al., 2018; Strozzi et al., 2019). For workflows, this means that anyone should be able to reconstruct the exact workflow run, including the correct sequence of steps, the actual commands, the runtime parameters and options, and the handling of data, e.g., chunking for parallelization, to reach the exact same conclusions despite differences in hardware, operating systems, and software dependencies. All this information must therefore be recorded in a way that is shareable and easy to understand, usually via code design documentation and the logs and `RO` described above.

Package managers, e.g., `Conda` and `Bioconda` (Grüning et al., 2018), provide means for clean shipping and installation of tools. Containerization technologies, e.g., `docker` and `singularity`, and their repositories (e.g `Dockstore` (O'Connor et al., 2017) and `quay.io`) facilitate the reproducibility of computational pipelines. Both these advancements are increasingly integrated in recent releases of `WfMS`s. Nextflow utilizes a `conda` directive to specify packages needed by a given `process` and supports a `container` directive that allows `processes` to specify the `docker` or `singularity` images in which execution occurs. While lacking `conda` support, Cromwell can run tasks within a `docker` image specified in a `WDL` `task` or `CWL CommandLineTool` runtime options. `Singularity` images require special handling in the backend configuration file, but are supported too. `Toil` has similar features, but neither is supported in `Swift/T`.

Furthermore, the high complexity of biological workflows has driven the community to develop extra requirements for code documentation (Alneberg et al., 2019; Hodges and Crusoe, 2020; Yuen et al., 2019). Users expect code annotation via extensive metadata including detailed workflow description, author information, and labels for stages, inputs, and outputs. Such metadata facilitate debugging, enhance overall project documentation via annotations on the `DAG`, help with maintaining and using a workflow written by someone else, and make code more searchable and citable. `CWL` and `WDL` each provide the code annotation capability via metadata blocks, and Nextflow via both the `manifest` scope of the configuration file and the directives of `processes`. `CWL` also includes support of `EDAM` ontology and `SciCrunch` identifiers for dependencies. `Swift/T` lacks this special workflow annotation feature, and only supports in-line comments.

Pragmatically, `CWL` recommended practices (Hodges and Crusoe, 2020) include shipping pipelines with permissive licenses and an `SPDX` identifier and using `SoftwareRequirement` to indicate dependencies and tool versions but warn against reliance on `InlineJavaRequirement` where possible. Adhering to these practices is a precursor to pipeline visualization and sharing

via CWLViewer (Robinson et al., 2018). Likewise, curating Nextflow pipelines in nf-core (Alneberg et al., 2019) requires using an MIT license, docker bundled software, stable release tags, a common pipeline structure, and continuous integration testing, in addition to passing their nf-core lint tests. They also recommend bundling the software via bioconda, using recent reference genome drafts and optimized output formats, and including a DOI, along with support and benchmarks from running in cloud environments (Ewels et al., 2020).

Taken together, the above efforts to enforce reproducibility of analyses also have resulted in a certain standardization of workflow implementation and distribution, which supports wider adoption of the WfMS.

### 3.15 Adoption and support

Nextflow, CWL and WDL all are fruits of practicing bioinformaticians and computer scientists collaborating with biologists, who needed practical solutions to the problem of reliably performing their own large-scale analyses. Consequently, they enjoy greater adoption than Swift/T (table 5), albeit relying on comparably very permissive open source licenses. As a result, their evolution is rapid and highly community-driven, and user support is easy to find via mailing lists, gitter channels, Twitter, GitHub issues, etc. The community aspect is particularly important here, with numerous conferences, codefests, hackathons, and even GA4GH itself serving to develop, refine and cross-pollinate among the WfMSs (Harris et al., 2016, 2017, 2018, 2019).

Adoption and support are further facilitated by commercial providers of genomics software-as-a-service. DNANexus provide dxWDL (<https://github.com/dnanexus/dxWDL>) and dx-cwl (<https://github.com/dnanexus/dx-cwl>). Seven Bridges developed rabix and many supporting utilities for CWL workflows, as they adopt CWL on their Cancer Genomics Cloud (Lau et al., 2017). AWS provides the iGenomes database (<https://registry.opendata.aws/aws-igenomes/>) with the ability to directly use Nextflow and Cromwell on AWS Batch.

With this much collaborative cross-talk activity in the community, it is unsurprising that sometimes the boundaries between the WfMSs gets blurred. The ability to translate a workflow language into intermediate representation, e.g., the WOM representation of CWL and WDL code in Cromwell, enables *stitching meta-workflows* written in more than one language. It is quite possible that in the future some kind of a hybrid workflow coding paradigm might emerge, adopting the best from each of the current WfMSs and discarding the differences. Yet, a tricky aspect to this community-driven movement is that the evolution of a workflow language and its engine might sometimes outpace the development of a given pipeline. Therefore, conformance tests and backwards compatibility between a workflow language and an execution engine are critical.

Table 5: GitHub activities from each WfMS (March 4th, 2021). *Contributors* is the number of contributors in each repo, *Open and Closed* refer to the count of open and closed issues and pull requests in the repo.

| WfMS     | First commit | Contributors | Closed | Open | License      |
|----------|--------------|--------------|--------|------|--------------|
| Swift-t  | 2011-05-11   | 16           | 109    | 81   | apache-2.0   |
| Nextflow | 2013-03-22   | 81           | 1770   | 159  | apache-2.0   |
| CWL      | 2014-09-25   | 62           | 667    | 249  | apache-2.0   |
| WDL      | 2012-08-01   | 44           | 376    | 50   | bsd-3-clause |

### 3.16 Cross-compatibility and conformance to standards

For a workflow language and an executor engine to work well together, they would ideally conform to the language specification and provide backwards compatibility to one another. This has not yet been widely the case, which is exactly what made this need apparent. For example, among WDL executors, both Toil and Cromwell can generate an abstract syntax tree from



the same [WDL](#) code, except Toil's [Hermes parser generator](#) ([Frazer, 2020](#)) translates tasks to Python functions, while Cromwell translates them into Bash. The supported code logic by each executor is also different: Cromwell does not allow nesting loops in version `draft-2` code, while Toil does not allow nesting a conditional within a loop or cascading tasks within a scatter body. In practice this leads to a lot of refactoring when switching from Cromwell to Toil. Similarly, different [CWL](#) runners support differing subsets of the possible [requirements](#) in the language specification or may even have different interpretations due to ambiguity in the language specification itself ([Eddy, 2018](#)). We believe the field would benefit from a wider conversation on this topic.

#### Highlights: Which WfMS to use day-to-day

In light of this, a pragmatic approach to workflow choice could be the following:

1. Assess: is there a need to build a new pipeline, or there is an existing reasonable pipeline in the Nextflow, [CWL](#), or [WDL](#) repos?
  - (a) If a workflow exists that follows good coding practices, it should be adopted and modified as per specific needs.
  - (b) If starting fresh, without any restrictions by collaborator preferences or existing code-base:
    - i. If a quick development cycle is important, Nextflow is optimal.
    - ii. If code readability is important, WDL is optimal.
    - iii. If execution environment is variable, or there is a need to work across heterogeneous hardware environments, CWL is optimal.

## 4 Discussion

The choice of a [WfMS](#) for a specific use case is dependent on the immediate needs and resources of the application. Within the bioinformatics community, Nextflow, [CWL](#), and [WDL](#) seem to be among the most adopted. The communities using and developing these three systems have been interacting closely since their introduction to the field, resulting in a very comparable set of semantic and engine features, though the nomenclature differs at times. Two other popular systems not examined in this study are Snakemake [Köster and Rahmann \(2012\)](#) and Galaxy [Afgan et al. \(2018\)](#). [GA4GH TES](#) support was only added to Snakemake in their November 2020 release, and Galaxy follows a rather different philosophy focusing on graphical user interface (while having its own [CLI](#)) and hence were excluded.

Another category is engines built as libraries in general-purpose programming languages, like Parsl ([Babuji et al., 2019](#)) (Python) and SciPipe ([Lampa et al., 2019](#))(Go). These engines give convenient access to the full expressiveness power and flexibility of the underlying language. Arguably, they are easier to learn, and hence, more attractive to adopt by a broader community than [DSL](#) workflow languages. At present, engines in this category seem less popular in the community though.

### 4.1 Scientific and Business WfMSs

The emphasis on *Scientific* in this manuscript is to distinguish those [WfMSs](#) typically used in modeling and other scientific experiments, from those employed in business applications or other organizational contexts where human participants make decisions ([Liu et al., 2015](#)). Accordingly, scientific workflows orchestrate tools (or services) based on data dependencies and often involve

many data types. Business workflows on the other hand have a richer set of control flow constructs to support hierarchical dependencies (Fernando et al., 2007).

Additionally, the need to reuse and port workflows within the sciences is contrasted with restrictions on data and process access in business. Yet, the business community is more strict in developing and following standards (Fernando et al., 2007), with frequent evaluations and frameworks for benchmarking conformance with those standards (Ferme et al., 2016; Geiger et al., 2018). The drive for standardization - despite early interoperability efforts, eg IWR (Fernando et al., 2007) and SHIWA (Rogers et al., 2013), has not surged in the sciences until recently, with ever larger scale collaborative and consortia projects (Edwards et al., 2011; Jagadish et al., 2014), and the push towards computational reproducibility (Waller and Miller, 2016). Among others, this resulted in a heritage of bespoke systems, inconsistent terminology and inoperable formats, as a consequence of different WfMSs design requirements. Standardization, conformance evaluation and interoperability will continue to be an active area of research in scientific WfMSs.

## 4.2 WfMSs in clinical and molecular diagnostic settings

Similar to research laboratories, clinical and diagnostic labs are concerned with the WfMSs aspects we examined above (also see supplementary note 1). However, there is focus towards properly developed, validated and operated pipelines that ensure the security of patient-identifying information, and the integrity and regulated access to data throughout each pipeline stage as per applicable laws and regulations (Gargis et al., 2015; Roy et al., 2018).

End-to-end validation using human samples, supplemented by in-silico validation, is both necessary and challenging given the constantly evolving and/or proprietary nature of computational tools, assay types and technology platforms. In fact, Roy et al. (2018) validation guidelines treat the bioinformatics pipeline as an integral part of the test procedure, and therefore require all its components to be validated, along with any filtering method applied to input data, and within an environment similar to the real-world lab where the pipeline will be used. Robust validation methods can involve the use of a “golden” set of workflow output files like `bams` and `vcfs` based on human samples with known laboratory-validated variants. This way, concordance with known variants can be tested, and additions or modifications to the workflow made safely. This validation should be overseen by a qualified medical professional with NGS training, only after the complete pipeline has been designed, developed and optimized.

To allow for ongoing development without interfering with production-tested pipelines, it is beneficial to have separate stages in a clinical computing environment such as development, testing, and production. Code is developed and bugs are resolved in the development and testing stages, so by the time code gets to production, it has been robustly tested in the prior stages. Existing usable code in the production stage will not be changed or updated until all tests are passed. This allows the clinical labs to use the production code, and developers to push new code out simultaneously that will eventually be tested and deployed in production.

## 4.3 Infrastructure as a predicate of WfMS design

A WfMS design is based on the infrastructure where it is intended to run. By employing an MPI library for parallel data communication, Swift/K (Wilde et al., 2011) for example, was made for large-scale computations on HPC environments extending to extreme scale supercomputing applications, and so are its successors - Swift/T (Armstrong et al., 2014; Wozniak et al., 2013) and Parsal (Babuji et al., 2019)- though Parsal has a wider bank of configurable executors including different cloud providers. On the other hand, other WfMSs like Toil (Vivian et al., 2017) and CWLairflow (Kotliar et al., 2019) were developed for data analysis in the cloud, and hence supported containerization. Standard languages, CWL and WDL, aimed to enhance portability by obviating the need for intermediate data representation while allowing different groups to

design and use executors that most fit their needs. This direct interplay between infrastructure and WfMSs will continue to play a key role in the design and composition of WfMSs well into the future with extreme scale systems and deep memory architectures (Deelman et al., 2017).

For example, while both *in situ* (i.e HPC) and *distributed* (i.e clouds and grids) workflows are challenged by analysis concurrency, locality and system topology awareness; more focus in the latter is paid towards security and crossing administrative domains (Deelman et al., 2017). Contrary, *in situ* designs, especially future exascale level, are challenged by power considerations, robustness, productivity with heterogeneous computing cores, increasingly complex hierarchical memory systems and small or no growth in bandwidth to external storage (Wozniak et al., 2016; Deelman et al., 2017). Consequently, Deelman et al. (2017) defines 4 key challenge areas for WfMS designs at the next scale: efficient task coupling, programming & usability, performance optimization & robustness, and validation & data integrity (Rynge et al., 2019)- a list to which da Silva et al. (2017) adds aspects like integrating big data analytics and human in the loop.

#### 4.4 Scalability

In bioinformatics, the community is still rather slow to adopt big data technologies, despite a few successful use cases (e.g., ADAM (Nothaft et al., 2015), Gesal (Roy et al., 2017), and most notably, the GATK's move towards Spark re-implementations of existing trusted tools (Voss et al., 2017)). This is in part due to a need for rigorous and lengthy approval cycles for clinical applications (Gargis et al., 2015), and also more incentives and rewards for designing and building new tools rather than improving existing ones. Collectively, this means that in a majority of tools commonly used today, scalability has been thought of as an ad hoc- not as an integral part of software design. This manifests as more reliance on threading than MPI implementations for example, and an often complicated dependency stack for tools to work. Therefore, there is a real need for WfMSs that support complex execution patterns (at least DAGs) and large data volumes.

Yet, fairly benchmarking and reporting the scalability of different WfMSs remains elusive. For example, Swift/T papers demonstrate scalability in task throughput versus cores to extreme- and peta- scale computations (Wilde et al., 2014; Wozniak et al., 2015), congruent with the intent of its developers to use it for large-scale parallel applications. Similarly, Parsal literature differentiates *strong scalability*, running the same number of jobs (50,000) vs increased number of workers (up to  $10^5$ ), from *weak scalability*, running the same number of tasks per worker (10) while increasing the number of workers (Babuji et al., 2019). Conversely, more bioinformatics-oriented WfMSs tend to demonstrate scalability in relation to the number or size of samples analyzed: Toil reports > 20,000 RNA seq samples analyzed on 1,000 nodes AWS c3.8xlarge cluster (each node of 32 cores, 60GB RAM, 640 GB SSD) in 4 days, and demonstrates scalability in terms of time and costs savings (Vivian et al., 2017), GLnexus quotes a 243,953 exome sequencing samples (33TB of compressed gvcfs) jointly called in 36 hours wall time with 1,600 threads (Lin et al., 2018).

#### 4.5 Other comparative evaluations

Previous comparative manuscripts tend to be largely descriptive (Deelman et al., 2009; Liu et al., 2015; Leipzig, 2016; Fjukstad and Bongo, 2017; da Silva et al., 2017; Deelman et al., 2017). The closest to our work is Larssonneur et al. (2018) where testing was limited to a single node in a cluster, with no information supplied about data size, beyond that the tested workflow needed 4-6 minutes. While they did use a realistic workflow, it is not clear how comparable the implementation was in the systems compared: Snakemake (python-based), Pegasus, Nextflow (java-based), Toil+CWL (python-based), and Cromwell+WDL (java-based). They conclude performance differences are due to the algorithms used to compute job dependencies, and criticize java-based engines for consuming the most memory. Their results indicate that Pegasus, despite

its very limited use in bioinformatics, is optimal for HPC environments (performing better or at least similarly to the other top performing executors in most categories: elapsed time, CPU usage, memory, and number of inodes). Snakemake was best in terms of I/O wait time and idle time, and Cromwell did the best in terms of number of voluntary and involuntary context switches, but was the worst in most the other categories (closely followed by Toil). Therefore, they advocate for MPI-based execution engines.

A recent relevant paper is that of Jackson et al. (2021). By rapid prototyping, they quickly evaluated Snakemake, CWL+CWL-tool, CWL+Toil, and Nextflow on a subset of RiboVis (Carja et al., 2017) workflows. Like our approach, this gave them a better perspective than solely reading the documentation, tutorials or other review papers. Also, their criteria for selecting those WfMSs were adoption and support within the bioinformatics community, maturity, and licensing. However, the scope of their paper did not go into as great a depth in examining features as was done here.

## 5 Trends & future directions

The revolution in the size and complexity of genomic data generation will continue to impact and be impacted by the progress in technology at the software and hardware levels. This manifests as a global trend in the community and funding bodies to attend to methods and software design, and also to plan for data analysis and handling as much as (if not more than) data generation. Another aspect are global efforts like those of the GA4GH and their designation of driver projects to refer to technology advancement at the levels of data transfers, security, storage and other relevant processing and accessibility aspects including ethics.

An optimistic trend for bioinformatics workflows is more attention being paid towards bridging the divide between user interface friendliness and expressiveness. On one hand, WfMSs like Galaxy that targeted user-friendliness from the beginning, are continuously expanding their code base with features to allow finer and more flexible control of execution details (Afgan et al., 2018). On the other, for the command-line frameworks examined here, many supporting tools exist that allow more friendly interfaces to the creation and deployment of workflow: NextflowWorkbench (Kurs et al., 2016), DolphinNext (Yukselen et al., 2020) for Nextflow; Rabix composer, CWL-Experimental <https://github.com/common-workflow-language/cwl-ex> for CWL; and womtool for WDL. Remarkably, away from womtool, all those supporting tools were contributed by the language's broad community (and not its core developers' team).

The growing need for portability of analyses also led to standard languages development (Fjukstad and Bongo, 2017) - and ultimately decoupling the language specification from its engine implementation. Immediate benefits include better synergy between what a language offers and what patterns an analyst actually needs supported, and also more human readable (WDL) and/or machine interoperable (CWL) languages; while having open communications between communities supporting the different standards. Equally, executors supporting multiple backends, leading to GA4GH standards (like TES and WES- minimal APIs describing how a user submits a tool/workflow to an execution engine in a standardized way), and thereby giving more portability across platforms. For example, many runners have been developed to execute CWL code, including Rabix (Kaushik et al., 2017), Avados, cwl-tes, Toil (Vivian et al., 2017), and AWE (Tang et al., 2013; Gerlach et al., 2014); while WDL code can be run via Cromwell (Voss et al., 2017) or Toil (Vivian et al., 2017). Additionally, there are runners for both languages on dedicated cloud platforms like DNAnexus, Seven Bridges, and Consonance. Concurrently, this encouraged other concerted efforts in areas like workflow provenance (Khan et al., 2018), and design of more powerful graphical interfaces, like: Rabix Composer (Kaushik et al., 2017) and CWLviewer (Robinson et al., 2018).

Thus, abiding by the FAIR principles (Wilkinson et al., 2016) for tools and workflows, became a necessity, as we move towards cloud computing (Fjukstad and Bongo, 2017). For these

purposes, many repositories exist today for sharing tools. Dockstore (O'Connor et al., 2017), the standard implementation of the GA4GH TRS, is now hosting docker-based tools described in Nextflow, besides CWL and WDL. Projects like bio.tools (<https://bio.tools/>), an ELIXIR Tools & Data Services Registry, support the findability and interoperability of bioinformatics application software by employing biotoolsSchema and EDAM ontologies (Ison et al., 2013) for software description and annotation. BioContainers (da Veiga Leprevost et al., 2017) is also another remarkable project as it hosts both both docker and rkt images, with special focus on tools in proteomics, genomics, transcriptomics and metabolomics. The ability of a WfMS to seamlessly fetch images from these repositories or publish workflows will undeniably be a bonus in today's market; along with the core features of running in heterogeneous environments, robustness and scalability. As the field evolves, the need for systematic performance benchmarking (Ferme et al., 2016) and conformance testing frameworks (Geiger et al., 2018) grows.

## 6 Data and code availability

The synthetic WES dataset used for the performance analysis of variant calling workflow will be made available by the authors, without undue reservation, to any qualified researcher. The commands used to generate this synthetic data are available at <https://github.com/nca/MayomicsVC/tree/dev-gatk>. Other code and data are provided in the respective repositories of table 1.

## 7 Acknowledgements

This work was a product of the Mayo Clinic and Illinois Alliance for Technology-Based Healthcare. Special thanks for the funding provided by the Mayo Clinic Center for Individualized Medicine and the Todd and Karen Wanek Program for Hypoplastic Left Heart Syndrome. We also thank the Interdisciplinary Health Sciences Institute, the Carl R. Woese Institute for Genomic Biology and the National Center for Supercomputing Applications for their generous support and access to resources. We particularly acknowledge the support of Keith Stewart, M.B., Ch.B., Mayo Clinic/Illinois Grand Challenge Sponsor and Director of the Mayo Clinic Center for Individualized Medicine. Special gratitude to Gay Reed and Amy Weckle for managing the project. Many thanks to the Biocluster team for their consultation and advice during the deployment of our workflows on their machine. Thanks also to the UIUC AWS infrastructure, and the AWS Research Credits Award for supporting this work. Finally we are grateful for the support of H3ABioNet, funded by the National Institutes of Health Common Fund under grant number U41HG006941.

## Acronyms

(API) Application Programming Interface. (AWS) Amazon Web Services. (CLI) Command Line Interface. (CPU) Central Processing Unit. (CRM) cluster resource manager. (CWL) Common Workflow Language. (DAG) Directed Acyclic Graph. (DOI) Digital Object Identifier. (DSL) Domain Specific Language. (EDAM) EMBRACE Data And Methods, a bioinformatics (dry) ontology. (FAIR) Findable, Accessible, Interoperable and Reproducible data standards. (GA4GH) Global Alliance for Genomics and Health . (GATK) Genome Analysis Toolkit. (GCP) Google Cloud Platform. (GUI) Graphical User Interface. (HPC) High Performance Computing. (IWR) Intermediate Workflow Representation. (JVM) Java Virtual Machine. (MPE) MPI Parallel Environment. (MPI) Message Passing Interface. (NGS) Next Generation Sequencing. (QA) Quality Assurance. (QC) Quality Control. (RAM) Random access Memory. (RO) Research Object. (SHIWA) Sharing Interoperable Workflows for large-scale scientific simulations on Available DCIs. (Tcl) Tool Command Language. (TES) Task Execution Schema. (TRS) Tool Registry Service. (URI) Uniform Resource Identifier, an internet protocol. (WDL) Workflow Description Language. (WES) Workflow Execution Service Schema. (WfMS) Workflow Management System. (WOM) Workflow Object Model

## References

- Ackerman, W. B. (1979), Data flow languages, in ‘1979 International Workshop on Managing Requirements Knowledge (MARK)’, IEEE, pp. 1087–1095.
- Afgan, E., Baker, D. et al. (2018), ‘The galaxy platform for accessible, reproducible and collaborative biomedical analyses: 2018 update’, *Nucleic Acids Res.* **46**(W1), W537–W544.
- Ahmed, A. E., Heldenbrand, J. et al. (2019), ‘Managing genomic variant calling workflows with swift/t’, *PLoS one* **14**(7).
- Alneberg, J., Peltzer, A. et al. (2019), ‘nf-core’. URL: <https://nf-co.re/>
- Amstutz, P., Crusoe, M. R. et al. (2016), ‘Common workflow language, v1.0’. URL: [https://figshare.com/articles/Common\\_Workflow\\_Language\\_draft\\_3/3115156/2](https://figshare.com/articles/Common_Workflow_Language_draft_3/3115156/2)
- Armstrong, T. G., Wozniak, J. M. et al. (2014), Compiler techniques for massively scalable implicit task parallelism, in ‘Proceedings of the International Conference for High Performance Computing, Networking, Storage and Analysis’, IEEE Press, pp. 299–310.
- Arvados team (2020), ‘Arvados | best practices for writing cwl’. URL: <https://doc.arvados.org/v1.4/user/cwl/cwl-style.html>
- Babuji, Y., Woodard, A. et al. (2019), Parsl: Pervasive parallel programming in python, in ‘Proceedings of the 28th International Symposium on High-Performance Parallel and Distributed Computing’, ACM, pp. 25–36.
- Belhajjame, K., Zhao, J. et al. (2015), ‘Using a suite of ontologies for preserving workflow-centric research objects’, *Journal of Web Semantics* **32**, 16–42.
- Bell, G., Hey, T. et al. (2009), ‘COMPUTER SCIENCE: Beyond the data deluge’, *Science* **323**(5919), 1297–1298.
- Birney, E., Vamathevan, J. et al. (2017), ‘Genomics in healthcare: Ga4gh looks to 2022’, *BioRxiv* p. 203554.
- Bocchino Jr, R. L., Adve, V. S. et al. (2009), Parallel programming must be deterministic by default, in ‘Proceedings of the First USENIX conference on Hot topics in parallelism’, pp. 4–4.
- Carja, O., Xing, T. et al. (2017), ‘riboviz: analysis and visualization of ribosome profiling datasets’, *BMC Bioinfo.* **18**(1), 1–4.
- CDAWS (2019), ‘Existing workflow systems’. URL: <https://github.com/common-workflow-language/common-workflow-language/wiki/Existing-Workflow-systems>
- CNRG (2020), ‘Biocluster- Carl R. Woese Institute for Genomic Biology, University of Illinois at Urbana-Champaign’. URL: <https://biocluster2.igb.illinois.edu/>
- CWL group (2020a), ‘common-workflow-language/cwl-v1.2: Current development cwl v1.2 specification’. URL: <https://github.com/common-workflow-language/cwl-v1.2>
- CWL group (2020b), ‘common-workflow-language/cwltool: Common workflow language reference implementation’. URL: <https://github.com/common-workflow-language/cwltool>
- da Silva, R. F., Filgueira, R. et al. (2017), ‘A characterization of workflow management systems for extreme-scale applications’, *Future Gener. Comput. Syst.* **75**, 228–238.
- da Veiga Leprevost, F., Grüning, B. A. et al. (2017), ‘BioContainers: an open-source and community-driven framework for software standardization’, *Bioinformatics* **33**(16), 2580–2582.
- Deelman, E., Gannon, D. et al. (2009), ‘Workflows and e-science: An overview of workflow system features and capabilities’, *Future Gener. Comput. Syst.* **25**(5), 528–540.
- Deelman, E., Peterka, T. et al. (2017), ‘The future of scientific workflows’, *Int. J. High Perform. Comput. Appl.* **32**(1), 159–175.
- Di Tommaso, P., Chatzou, M. et al. (2017), ‘Nextflow enables reproducible computational workflows’, *Nat. Biotechnol.* **35**(4), 316.
- Di Tommaso, P. and Hancock, P. (2020), ‘Proposal for supporting a dry-run like feature · issue #1774 · nextflow-io/nextflow’. URL: <https://github.com/nextflow-io/nextflow/issues/1774>
- Eddy, J. (2018), ‘The ga4gh/dream workflow execution challenge’, *BOSC 2018, Portland*. DOI:10.6084/m9.figshare.6716063.v1.
- Edwards, P. N., Mayernik, M. S. et al. (2011), ‘Science friction: Data, metadata, and collaboration’, *Soc. Stud. Sci.* **41**(5), 667–690.
- EPAM systems (2019). URL: <https://github.com/epam/pipeline-builder>
- Ewels, P. A., Peltzer, A. et al. (2019), ‘nf-core: Community curated bioinformatics pipelines’, *bioRxiv* p. 610741.
- Ewels, P. A., Peltzer, A. et al. (2020), ‘The nf-core framework for community-curated bioinformatics pipelines’, *Nature biotechnology* **38**(3), 276–278.
- Ferme, V., Ivanchikj, A. et al. (2016), A framework for benchmarking bpmn 2.0 workflow management systems, in ‘International conference on business process management’, Springer, pp. 251–259.
- Fernando, S. D. I., Creager, D. A. et al. (2007), Towards build-time interoperability of workflow definition languages, in ‘Ninth International Symposium on Symbolic and Numeric Algorithms for Scientific Computing (SYNASC 2007)’, IEEE.
- Fjukstad, B. and Bongo, L. A. (2017), ‘A review of scalable bioinformatics pipelines’, *Data Sci. Eng.* **2**(3), 245–251.
- Franz, M., Lopes, C. T. et al. (2015), ‘Cytoscape.js: a graph theory library for visualisation and analysis’, *Bioinformatics* **32**(2), 309–311.

- Frazer, S. (2020), ‘Hermes: Python ll(1) parser generator with expression parsing’. URL: <https://github.com/scottfrazer/hermes>
- Gargis, A. S., Kalman, L. et al. (2015), ‘Good laboratory practice for clinical next-generation sequencing informatics pipelines’, *Nat. Biotechnol.* **33**(7), 689–693.
- Garriga Nogales, E., Di Tommaso, P. et al. (2018), ‘Nextflow integration for the Research Object Specification’.
- Geiger, M., Harrer, S. et al. (2018), ‘Bpmm 2.0: The state of support and implementation’, *Future Generation Computer Systems* **80**, 250–262.
- Gerlach, W., Tang, W. et al. (2014), Skyport - container-based execution environment management for multi-cloud scientific workflows, in ‘2014 5th International Workshop on Data-Intensive Computing in the Clouds’, IEEE.
- Grüning, B., Dale, R. et al. (2018), ‘Bioconda: sustainable and comprehensive software distribution for the life sciences’, *Nat. Methods* **15**(7), 475.
- Grüning, B., Chilton, J. et al. (2018), ‘Practical computational reproducibility in the life sciences’, *Cell Syst.* **6**(6), 631–635.
- Harris, N. L., Cock, P. J. et al. (2016), ‘The 2016 bioinformatics open source conference (bosc)’, *F1000Research* **5**.
- Harris, N. L., Cock, P. J. et al. (2017), ‘The 2017 bioinformatics open source conference (bosc)’, *F1000Research* **6**.
- Harris, N. L., Cock, P. J. et al. (2019), ‘Bosc 2019, the 20th annual bioinformatics open source conference’, *F1000Research* **8**(2132), 2132.
- Harris, N. L., Wiencko, H. et al. (2018), ‘The 2018 bioinformatics open source conference (gccbosc 2018)’, *F1000Research* **7**.
- Hines, J. (2018), ‘Genomics code exceeds exaops on summit supercomputer – oak ridge leadership computing facility’. URL: <https://www.olcf.ornl.gov/2018/06/08/genomics-code-exceeds-exaops-on-summit-supercomputer/>
- Hodges, T. and Crusoe, M. R. (2020), ‘Recommended practices – common workflow language user guide’. URL: [https://www.commonwl.org/user\\_guide/rec-practices/](https://www.commonwl.org/user_guide/rec-practices/)
- Ison, J., Kalas, M. et al. (2013), ‘EDAM: an ontology of bioinformatics operations, types of data and identifiers, topics and formats’, *Bioinformatics* **29**(10), 1325–1332.
- Jackson, M., Kavoussanakis, K. et al. (2021), ‘Using prototyping to choose a bioinformatics workflow management system’, *PLoS Computational Biology* **17**(2), e1008622.
- Jagadish, H., Gehrke, J. et al. (2014), ‘Big data and its technical challenges’, *Commun. ACM* **57**(7), 86–94.
- Kaushik, G., Ivkovic, S. et al. (2017), Rabix: an open-source workflow executor supporting recomputability and interoperability of workflow descriptions, in ‘PACIFIC SYMPOSIUM ON BIOCOMPUTING 2017’, World Scientific, pp. 154–165.
- Khan, F. Z., Soiland-Reyes, S. et al. (2018), ‘Cwlprov—interoperable retrospective provenance capture and its challenges’, *F1000Research* **7**.
- Khan, F. Z., Soiland-Reyes, S. et al. (2019), ‘Sharing interoperable workflow provenance: A review of best practices and their practical application in cwlprov’, *GigaScience* **8**(11), giz095.
- Köster, J. and Rahmann, S. (2012), ‘Snakemake—a scalable bioinformatics workflow engine’, *Bioinformatics* **28**(19), 2520–2522.
- Kotliar, M., Kartashov, A. V. et al. (2019), ‘Cwl-airflow: a lightweight pipeline manager supporting common workflow language’, *GigaScience* **8**(7), giz084.
- Kurs, J. P., Simi, M. et al. (2016), ‘NextflowWorkbench: Reproducible and reusable workflows for beginners and experts’, *bioRxiv*.
- Lampa, S., Dahlö, M. et al. (2019), ‘Scipipe: A workflow library for agile development of complex and dynamic bioinformatics pipelines’, *GigaScience* **8**(5), giz044.
- Langmead, B. and Nellore, A. (2018), ‘Cloud computing for genomic data analysis and collaboration’, *Nat. Rev. Genet.* **19**(5), 325–325.
- Larsonneur, E., Mercier, J. et al. (2018), Evaluating workflow management systems: A bioinformatics use case, in ‘2018 IEEE International Conference on Bioinformatics and Biomedicine (BIBM)’, IEEE, pp. 2773–2775.
- Lau, J. W., Lehnert, E. et al. (2017), ‘The cancer genomics cloud: collaborative, reproducible, and democratized—a new paradigm in large-scale computational research’, *Cancer Res.* **77**(21), e3–e6.
- Leipzig, J. (2016), ‘A review of bioinformatic pipeline frameworks’, *Briefings Bioinf.* p. bbw020.
- Lin, M., DavyCats et al. (2020), ‘miniwdl’. URL: <https://github.com/chanzuckerberg/miniwdl>
- Lin, M. F., Rodeh, O. et al. (2018), ‘Glnexus: joint variant calling for large cohort sequencing’, *bioRxiv* p. 343970.
- Liu, J., Pacitti, E. et al. (2015), ‘A survey of data-intensive scientific workflow management’, *J. Grid Comput.* **13**(4), 457–493.
- Mainzer, L. S., Balgi, P. et al. (2020), ‘ncsa/mayomicsvc v1.0.0’. URL: <https://doi.org/10.5281/zenodo.3679275>
- McKenna, A., Hanna, M. et al. (2010), ‘The genome analysis toolkit: A MapReduce framework for analyzing next-generation DNA sequencing data’, *Genome Research* **20**(9), 1297–1303.
- Milton, M. (2019), ‘Tmiguelt/vue-cwl: 1.0.4’, *Zenodo*. DOI:10.5281/zenodo.3368161.

- Nothaft, F. A., Massie, M. et al. (2015), Rethinking data-intensive science using scalable analytics systems, in 'Proceedings of the 2015 ACM SIGMOD International Conference on Management of Data', ACM, pp. 631–646.
- O'Connor, B. D., Yuen, D. et al. (2017), 'The dockstore: enabling modular, community-focused sharing of docker-based genomics tools and workflows', *F1000Research* **6**.
- Robinson, M., Soiland-Reyes, S. et al. (2018), 'common-workflow-language/cwlviewer: CWL Viewer v1.3.0'. URL: <https://doi.org/10.5281/zenodo.1284474>
- Robinson, M., Soiland-Reyes, S. et al. (2020), 'About - common workflow language viewer'. URL: <https://view.commonwl.org/about>
- Rogers, D., Harvey, I. et al. (2013), 'Bundle and pool architecture for multi-language, robust, scalable workflow executions', *Journal of grid computing* **11**(3), 457–480.
- Roy, A., Diao, Y. et al. (2017), Massively parallel processing of whole genome sequence data: an in-depth performance study, in 'Proceedings of the 2017 ACM International Conference on Management of Data', ACM, pp. 187–202.
- Roy, S., Coldren, C. et al. (2018), 'Standards and guidelines for validating next-generation sequencing bioinformatics pipelines', *J. Mol. Diagn.* **20**(1), 4–27.
- Rynge, M., Vahi, K. et al. (2019), Integrity protection for scientific workflow data: Motivation and initial experiences, in 'Proceedings of the Practice and Experience in Advanced Research Computing on Rise of the Machines (Learning)', PEARC '19, Association for Computing Machinery, New York, NY, USA. URL: <https://doi.org/10.1145/3332186.3332222>
- Schulz, W., Durant, T. et al. (2016), 'Use of application containers and workflows for genomic data analysis', *J. Pathol. Informat.* **7**(1), 53.
- Scott, M. L. (2009), *Programming language pragmatics*, third edition edn, Morgan Kaufmann.
- Smith, J., Bergelson, L. et al. (2020), 'broadinstitute /cromshell'. URL: <https://github.com/broadinstitute/cromshell>
- Soiland-Reyes, S., Khan, F. Z. et al. (2018), 'common-workflow-language/cwlprov: Cwlprov 0.6.0'.
- St. Jude Cloud Team (2020), 'Oliver'. URL: <https://stjudecloud.github.io/oliver/>
- Stephens, Z. D., Hudson, M. E. et al. (2016), 'Simulating next-generation sequencing datasets from empirical mutation and sequencing models', *PloS one* **11**(11).
- Stephens, Z. D., Lee, S. Y. et al. (2015), 'Big data: Astronomical or genetical?', *PLoS Biol.* **13**(7), e1002195.
- Strozzi, F., Janssen, R. et al. (2019), Scalable workflows and reproducible data analysis for genomics, in 'Evolutionary Genomics', Springer, pp. 723–745.
- Tang, W., Wilkening, J. et al. (2013), A scalable data analysis platform for metagenomics, in '2013 IEEE International Conference on Big Data', IEEE.
- Tommaso, P. D. (2019), 'pditommaso/awesome-pipeline: A curated list of awesome pipeline toolkits inspired by awesome sysadmin'. URL: <https://github.com/pditommaso/awesome-pipeline>
- Tommaso, P. D., Crespo, T. et al. (2020), 'nextflow tower'. URL: <https://tower.nf/>
- Tommaso, P. D., Floden, E. et al. (2019). URL: <http://nextflow-io.github.io/patterns/index.html>
- Tommaso, P. D., Palumbo, E. et al. (2015), 'The impact of docker containers on the performance of genomic pipelines', *PeerJ* **3**, e1273.
- van Der Aalst, W. M., Ter Hofstede, A. H. et al. (2003), 'Workflow patterns', *Distributed and parallel databases* **14**(1), 5–51.
- Van der Auwera, G. A., Carneiro, M. O. et al. (2013), 'From fastq data to high-confidence variant calls: the genome analysis toolkit best practices pipeline', *Curr. Protoc. Bioinf.* **43**(1), 11–10.
- Vivian, J., Rao, A. A. et al. (2017), 'Toil enables reproducible, open source, big biomedical data analyses', *Nat. Biotechnol.* **35**(4), 314.
- Voss, K., Gentry, J. et al. (2017), 'Full-stack genomics pipelining with gatk4+ wdl+ cromwell [version 1; not peer reviewed]'
- Waller, L. A. and Miller, G. W. (2016), 'More than manuscripts: Reproducibility, rigor, and research productivity in the big data era'.
- Wilde, M., Hategan, M. et al. (2011), 'Swift: A language for distributed parallel scripting', *Parallel Comput.* **37**(9), 633–652.
- Wilde, M., Wozniak, J. M. et al. (2014), Productive composition of extreme-scale applications using implicitly parallel dataflow, in 'DOE Workshop on Software Productivity for eXtreme scale Science (SWP4XS)'
- Wilkinson, M. D., Dumontier, M. et al. (2016), 'The fair guiding principles for scientific data management and stewardship', *Sci. Data* **3**.
- Wozniak, J. M., Armstrong, T. G. et al. (2013), Swift/t: scalable data flow programming for many-task applications., in 'PPOPP', Citeseer, pp. 309–310.
- Wozniak, J. M., Armstrong, T. G. et al. (2015), Swift/t: Dataflow composition of tcl scripts for petascale computing, in 'Proc. Annual Tcl/Tk Conference', Citeseer.
- Wozniak, J. M., Wilde, M. et al. (2016), Challenges and opportunities for dataflow processing on exascale computers, in 'Proceedings of the Sixth Workshop on Data-Flow Execution Models for Extreme Scale Computing', ACM, p. 4.



Yuen, D., O'Connor, B. et al. (2019), 'Dockstore 2.0: Enhancing a community platform for sharing cloud-agnostic research tools', *F1000 Research Limited*. [version 1; not peer reviewed], DOI:10.7490/f1000research.1117142.1.  
Yukselen, O., Turkyilmaz, O. et al. (2020), 'Dolphinnext: a distributed data processing platform for high throughput genomics', *BMC genomics* **21**, 1–16.
